# Supplementary material for: A density functional theory analysis of the adsorption and surface chemistry of inorganic iodine species on graphitea
Source: Frontiers journal article supplement (doi:10.3389/fnuen.2023.1170424), 2023-05-18
Supplement: Data_Sheet_1.PDF [file Data_Sheet_1.PDF]

Electronic Supporting Information  
A density functional theory investigation of the adsorption of  
inorganic iodine species on graphitic surfaces

Andrew M. Ritzmann

National Security Directorate, Pacific Northwest National Laboratory  
902 Battelle Boulevard, P.O. Box 999, Richland WA, 99352, USA

Email: [andrew.ritzmnn@pnnl.gov](mailto:andrew.ritzmnn@pnnl.gov)

Phone: (509) 372-7235

Michel Sassi

Physical and Computational Sciences Directorate, Pacific Northwest National Laboratory

Neil J. Henson

National Security Directorate, Pacific Northwest National Laboratory

Alyssa E. Johnson

National Security Directorate, Pacific Northwest National Laboratory

Present Address: Department of Chemical & Biomolecular Engineering, Tulane University

Michael D. LaCount

National Security Directorate, Pacific Northwest National Laboratory

February 14, 2023

## S.1 Molecular Calculations

The adsorption energies calculated in sections 3.2-3.7 of the main text require the energy of the isolated molecule as an input quantity. This section of the supporting information describes the methods for obtaining these energies and gives the results of these calculations. The molecules investigated are  $\text{I}_2$ ,  $\text{HI}$ ,  $\text{HOI}$ ,  $\text{HIO}_2$ ,  $\text{HIO}_3$ , and  $\text{CH}_3\text{I}$ .

### S.1.1 Computational Details

The Vienna *ab Initio* Simulation Package (VASP)<sup>S1-S3</sup> was used to perform spin-polarized Kohn-Sham density functional theory (DFT) calculations.<sup>S4,S5</sup> Molecular calculations were carried out in a 15Å by 15Å by 15Å box. The planewave kinetic energy cutoff was 900 eV, and only the gamma-point was sampled. The molecules were placed in the corner of the cell, and dipole corrections in the X-, Y-, and Z-directions were applied.

The projector augmented-wave<sup>S6</sup> method was used, and the standard potentials ('H', 'O', 'I', and 'C') from the VASP library<sup>S7</sup> were employed (see Table S.1 for the specific file names).

Table S.1: POTCAR file paths within the VASP PAW library

| Element | POTCAR File |
|---------|-------------|
| H       | H/POTCAR    |
| C       | C/POTCAR    |
| O       | O/POTCAR    |
| I       | I/POTCAR    |

## S.2 VASP Input Files

In addition to the POTCAR files mentioned in Section S.1.1, we provide example INCAR and KPOINTS files for the calculations. Many different types of systems were analyzed (bulk solid, slab, and molecule), so the INCAR file is annotated to indicate which flags are relevant in each situation. The same concept applies to choosing the method for computing the van der Waals interactions. The KPOINTS file is representative of the calculations, but the mesh must be changed based on the sizes specified in the main text and supporting informatoin.

### S.2.1 INCAR File

```
SYSTEM=GRAPHITE

# Start/Restart parameters
ISTART = 0
ICHARG = 2
INIWAV = 1

# SCF Calculation Parameters
PREC   = Accurate
ENCUT  = 900
ALGO   = Normal
```

```

TIME      = 0.2
LSUBROT= .FALSE.
EDIFF     = 1E-06
NELM      = 200
NELMIN    = 5
NELMDL    = -4
ISPIN     = 2
LREAL     = .FALSE.
MAGMOM    = 0 0 0 0
NBANDS    = 24

# Brillouin Zone Integration and DOS Parameters
ISMEAR    = 0
SIGMA     = 0.1
ISYM      = 0

# Ionic Relaxation Parameters
EDIFFG    = -0.01
NSW       = 100
IBRION    = 1
POTIM     = 0.5
ISIF      = 3      # set to 0 for molecules and slabs

# Parallelization Options
LPLANE    = .TRUE.
LSCALU    = .FALSE.
LSCALAPACK = .FALSE.
NCORE     = 4
KPAR      = 1

# Output Options
LCHARG    = .FALSE.
LWAVE     = .FALSE.
LAECHG    = .FALSE.
LORBIT    = 11

# Dipole Corrections
#   Turn on (LDIPOL=.TRUE.) for slabs and molecules
#   For slabs, use IDIPOL=3 (assuming vacuum along c-axis)
#       Place slab near the bottom of the cell
#   For molecules, use IDIPOL=4 and place the molecule in the corner
#       of the cell (computationally more stable)
#LDIPOL   = .TRUE.
#IDIPOL   = 4

# Aspherical Corrections (needed for DFT-DF methods)

```

```

LASPH = .TRUE.

# Meta-GGA
# METAGGA = SCAN

# vDW corrections
# This input is set to use DFT-D3, but commenting/uncommenting
# the appropriate sections can activate DFT-DF, SCAN, or SCAN-RVV10
# calculations.
#
# DFT-D3
IVDW = 11

# DFT-DF (Langreth and Lundqvist et al.)
# Method reference: Dion et al. Phys. Rev. Lett. 92: 246401 (2004)
# Implementation Reference: Klimes et al. Phys. Rev. B 83: 195131 (2011)
# GGA = RE                # PE=PBE, RE=revPBE, OR=optPBE (for DFT-DF)
# LUSE_VDW = .TRUE.
# AGGAC = 0.0000
#
# SCAN + rVV10
# Method Reference: Phys. Rev. X 6: 041005 (2016)
#
# METAGGA=SCAN
# LUSE_VDW = .TRUE.
# BPARAM = 15.7

```

### S.2.1.1 KPOINTS File

```

Graphite
0
Gamma
21 21 7
0.0 0.0 0.0

```

### S.3 Structural and Vibrational Results

Both the SCAN functional and the SCAN+RVV10 calculations failed to produce vibrational frequencies.

Table S.2: Results for the I<sub>2</sub> molecule the PBE, PBE-D3, DFT-DF, SCAN, and SCAN-RVV10 methodologies. Bond length ( $d_{I-I}$  in Å), and vibrational frequency ( $\nu$  in cm<sup>-1</sup>).

| Functional/Method | PBE    | PBE-D3 | DFT-DF | SCAN   | SCAN-RVV10 | Experiment <sup>S8</sup> |
|-------------------|--------|--------|--------|--------|------------|--------------------------|
| $d_{I-I}$         | 2.6824 | 2.6824 | 2.7253 | 2.6674 | 2.6653     | 2.6655                   |
| $\nu$             | 215    | 215    | 201    | N/A    | N/A        | 213                      |

Table S.3: Results for the HI molecule the PBE, PBE-D3, DFT-DF, SCAN, and SCAN-RVV10 methodologies. Bond length ( $d_{H-I}$  in Å), and vibrational frequency (in  $\text{cm}^{-1}$ ).

| Functional/Method | PBE    | PBE-D3 | DFT-DF | SCAN   | SCAN-RVV10 | Experiment <sup>S8</sup> |
|-------------------|--------|--------|--------|--------|------------|--------------------------|
| $d_{H-I}$         | 1.6255 | 1.6255 | 1.6295 | 1.6127 | 1.6126     | 1.6092                   |
| $\nu$             | 2268   | 2268   | 2228   | N/A    | N/A        | 2230                     |

Table S.4: Results for the HOI molecule the PBE, PBE-D3, DFT-DF, SCAN, and SCAN-RVV10 methodologies. Bond lengths ( $d$  in Å), bond angles ( $\theta$  in degrees), and vibrational frequencies ( $\nu$  in  $\text{cm}^{-1}$ ).

| Functional/Method  | PBE     | PBE-D3  | DFT-DF  | SCAN    | SCAN-RVV10 | Experiment <sup>S8</sup> |
|--------------------|---------|---------|---------|---------|------------|--------------------------|
| $d_{H-O_1}$        | 0.9768  | 0.9768  | 0.9765  | 0.9681  | 0.9681     | 0.967                    |
| $d_{O_1-I}$        | 2.0054  | 2.0058  | 2.0328  | 1.9872  | 1.9867     | 1.994                    |
| $\theta_{H-O_1-I}$ | 104.383 | 104.419 | 104.438 | 104.528 | 104.549    | 103.89                   |
| $\nu_1$            | 3717    | 3717    | 3685    | N/A     | N/A        | 3626                     |
| $\nu_2$            | 1061    | 1059    | 1067    | N/A     | N/A        | 1070                     |
| $\nu_3$            | 569     | 568     | 536     | N/A     | N/A        | 575                      |

Table S.5: Results for the  $\text{HIO}_2$  molecule the PBE, PBE-D3, DFT-DF, SCAN, and SCAN-RVV10 methodologies. Bond lengths ( $d$  in Å), bond angles ( $\theta$  in degrees), dihedral angles ( $\alpha$  in degrees), and vibrational frequencies (in  $\text{cm}^{-1}$ ). No experimental data was found for the  $\text{HIO}_2$  in the gas phase.

| Functional/Method      | PBE     | PBE-D3  | DFT-DF  | SCAN    | SCAN-RVV10 |
|------------------------|---------|---------|---------|---------|------------|
| $d_{H-O_1}$            | 0.9785  | 0.9785  | 0.9785  | 0.9699  | 0.9698     |
| $d_{O_1-I}$            | 2.0044  | 2.0044  | 2.0343  | 1.9813  | 1.9806     |
| $d_{I=O_2}$            | 1.8279  | 1.8279  | 1.8444  | 1.8124  | 1.8121     |
| $\theta_{H-O_1-I}$     | 106.517 | 106.517 | 106.535 | 106.527 | 106.553    |
| $\theta_{O_1-I=O_2}$   | 105.800 | 105.800 | 105.683 | 105.111 | 105.065    |
| $\alpha_{H-O_1-I=O_2}$ | 82.0574 | 82.0574 | 80.5083 | 81.5726 | 81.5344    |
| $\nu_1$                | 3690    | 3690    | 3655    | N/A     | N/A        |
| $\nu_2$                | 996     | 995     | 1003    | N/A     | N/A        |
| $\nu_3$                | 781     | 781     | 744     | N/A     | N/A        |
| $\nu_4$                | 532     | 532     | 496     | N/A     | N/A        |
| $\nu_5$                | 360     | 359     | 352     | N/A     | N/A        |
| $\nu_6$                | 207     | 207     | 199     | N/A     | N/A        |



Table S.6: Results for the  $\text{HIO}_3$  molecule the PBE, PBE-D3, DFT-DF, SCAN, and SCAN-RVV10 methodologies. Bond lengths (d in Å), bond angles ( $\theta$  in degrees), dihedral angles ( $\alpha$  in degrees), and vibrational frequencies (in  $\text{cm}^{-1}$ ). No experimental data was found for the  $\text{HIO}_3$  in the gas phase.

| Method                 | PBE     | PBE-D3  | DFT-DF  | SCAN    | SCAN-RVV10 |
|------------------------|---------|---------|---------|---------|------------|
| $d_{H-O_1}$            | 0.9823  | 0.9823  | 0.9816  | 0.9743  | 0.9742     |
| $d_{O_1-I}$            | 1.9754  | 1.9754  | 2.0051  | 1.9528  | 1.9522     |
| $d_{I=O_2}$            | 1.7883  | 1.7883  | 1.8008  | 1.7718  | 1.7716     |
| $d_{I=O_3}$            | 1.7848  | 1.7848  | 1.7982  | 1.7683  | 1.7679     |
| $\theta_{H-O_1-I}$     | 106.928 | 106.928 | 107.541 | 106.611 | 106.608    |
| $\theta_{O_1-I=O_2}$   | 100.961 | 100.961 | 101.523 | 100.422 | 100.445    |
| $\theta_{O_2-I=O_3}$   | 107.573 | 107.573 | 103.373 | 102.709 | 102.659    |
| $\alpha_{H-O_1-I=O_2}$ | 28.7257 | 28.7257 | 33.3514 | 29.5039 | 29.1638    |
| $\alpha_{H-O_1-I=O_3}$ | 82.4432 | 82.4432 | 77.9152 | 81.0337 | 81.2912    |
| $\nu_1$                | 3643    | 3643    | 3620    | N/A     | N/A        |
| $\nu_2$                | 937     | 936     | 948     | N/A     | N/A        |
| $\nu_3$                | 858     | 858     | 825     | N/A     | N/A        |
| $\nu_4$                | 831     | 831     | 798     | N/A     | N/A        |
| $\nu_5$                | 542     | 542     | 505     | N/A     | N/A        |
| $\nu_6$                | 292     | 293     | 285     | N/A     | N/A        |
| $\nu_7$                | 253     | 253     | 242     | N/A     | N/A        |
| $\nu_8$                | 220     | 220     | 213     | N/A     | N/A        |
| $\nu_9$                | 80      | 78      | 77      | N/A     | N/A        |

Table S.7: Results for the CH<sub>3</sub>I molecule the PBE, PBE-D3, DFT-DF, SCAN, and SCAN-RVV10 methodologies. Bond lengths ( $d$  in Å), bond angles ( $\theta$  in degrees), and vibrational frequencies (in cm<sup>-1</sup>).

| Method           | PBE     | PBE-D3  | DFT-DF  | SCAN    | SCAN-RVV10 | Experiment <sup>S8</sup> |
|------------------|---------|---------|---------|---------|------------|--------------------------|
| $d_{C-H}$        | 1.0917  | 1.0918  | 1.0883  | 1.0834  | 1.0834     | 1.0840                   |
| $d_{C-I}$        | 2.1511  | 2.1531  | 2.1844  | 2.1379  | 2.1379     | 2.1358                   |
| $\theta_{H-C-I}$ | 107.557 | 107.569 | 107.127 | 107.508 | 107.508    | 107.470                  |
| $\theta_{H-C-H}$ | 111.343 | 111.323 | 111.695 | 111.376 | 111.377    | 111.396                  |
| $\nu_1$          | 3140    | 3137    | 3129    | N/A     | N/A        | 3060                     |
| $\nu_2$          | 3029    | 3025    | 3026    | N/A     | N/A        | 2933                     |
| $\nu_3$          | 1420    | 1419    | 1452    | N/A     | N/A        | 1436                     |
| $\nu_4$          | 1230    | 1230    | 1250    | N/A     | N/A        | 1252                     |
| $\nu_5$          | 865     | 863     | 872     | N/A     | N/A        | 882                      |
| $\nu_6$          | 528     | 524     | 495     | N/A     | N/A        | 533                      |

## S.4 Static Polarizability Study

To explore whether or not the strength of adsorption could be explained by London dispersion, we performed a supplemental examination of the static polarizability of the molecules in a vacuum using NWCHEM. For this supplemental study we opted to use the PBE functional, with the 6-311G\*\* basis set. To ensure consistency the geometries were allowed to relax before performing the polarizability calculation. The results of the calculation are the electric dipole ( $\mu$ ), the isotropic static polarizability ( $\alpha_{iso}$ ), the anisotropic static polarizability ( $\alpha_{aniso}$ ) and the average static polarizability ( $\alpha_{avg}$ ). These are summarized in the table S.8 below:

Table S.8: Summary of results for the linear response calculation. Adsorption energy and graphite iodine distance are also displayed for reference. Adsorption energy is given in (kJ/mol), graphite iodine distance ( $d$ ) in (Å), and all other data is in atomic units.

| Molecule         | HI    | HIO <sub>2</sub> | HIO <sub>3</sub> | CH <sub>3</sub> I | HOI   | I <sub>2</sub> |
|------------------|-------|------------------|------------------|-------------------|-------|----------------|
| $E_{ads}$        | 21.2  | 23.4             | 23.9             | 28.9              | 30.8  | 33.1           |
| $d$              | 3.52  | 3.79             | 3.93             | 3.69              | 3.68  | 3.73           |
| $\alpha_{iso}$   | 23.09 | 35.63            | 40.92            | 37.24             | 28.00 | 51.75          |
| $\alpha_{aniso}$ | 8.12  | 22.60            | 15.08            | 20.85             | 16.08 | 49.04          |
| $\alpha_{avg}$   | 23.09 | 35.63            | 40.92            | 37.24             | 28.00 | 51.75          |

The most promising trend we observe is that as the isotropic polarizability increases so does the adsorption energy. However, CH<sub>3</sub>I and HOI, don't follow the trend. CH<sub>3</sub>I can plausibly be said to have a higher adsorption energy by being able to adsorb closer to the graphite. However, this would not be enough to explain why HOI has a higher adsorption energy than CH<sub>3</sub>I, despite having nearly identical surface to iodine distance and a smaller polarizability. The most likely hypothesis in our opinion is that the relative location and orientation of the HOI above the graphite leads to a greater London dispersion force than would be predicted by a simple comparisons of the magnitude of the static isotropic polarizability. Further calculations exploring this are beyond the focus of this work, but may be explored in future studies.

In summary, while we do observe an apparent qualitative trend between isotropic polarizability and the adsorption energy, other factors such as orientations and distance prevent us from concluding a definitive qualitative trend.

## References

- S1 G. Kresse and J. Hafner, *Phys. Rev. B*, 1993, **48**, 13115–13118.
- S2 G. Kresse and J. Furthmüller, *Phys. Rev. B*, 1996, **54**, 11169–11186.
- S3 G. Kresse and J. Furthmüller, *Comp. Mater. Sci.*, 1996, **6**, 15–50.
- S4 P. Hohenberg and W. Kohn, *Phys. Rev.*, 1964, **136**, B864–B871.
- S5 W. Kohn and L. J. Sham, *Phys. Rev.*, 1965, **140**, A1133–A1138.
- S6 P. E. Blöchl, *Phys. Rev. B*, 1994, **50**, 17953–17979.
- S7 G. Kresse and D. Joubert, *Phys. Rev. B*, 1999, **59**, 1758–1775.
- S8 *NIST Chemistry WebBook, NIST Standard Reference Database Number 69*, ed. P. Linstrom and W. Mallard, National Institute of Standards and Technology, Gaithersburg MD, 20899, 2022.
